# Supplementary material for: S100A9, as a potential predictor of prognosis and immunotherapy response for GBM, promotes the malignant progression of GBM cells and migration of M2 macrophages
Source: publisher site journal article supplement (doi:10.18632/aging.205949), 2024-06-19
Supplement: Supplementary file [file aging-v16i15-205949-supplementary-material-SD1.pdf]

**SUPPLEMENTARY FIGURE**

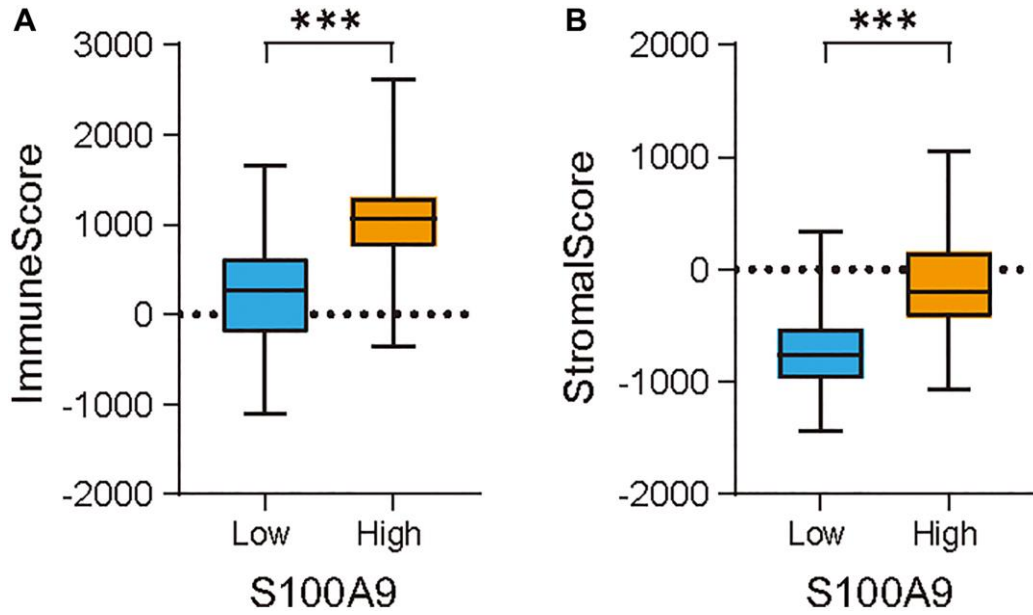

**Supplementary Figure 1. Differential analysis of immune score and stromal score between high and low expression groups of S100A9.** (A) The immune score of the S100A9 high expression group was significantly higher than that of the S100A9 low expression group. (B) The stromal score of the S100A9 high expression group was significantly higher than that of the S100A9 low expression group.
