# Supplementary material for: S100A9, as a potential predictor of prognosis and immunotherapy response for GBM, promotes the malignant progression of GBM cells and migration of M2 macrophages
Source: publisher site journal article supplement (doi:10.18632/aging.205949), 2024-06-19
Supplement: Supplementary file [file aging-v16i15-205949-supplementary-material-SD2.pdf]

## SUPPLEMENTARY TABLE

Supplementary Table 1. Abbreviations of various cancers in pan-cancer.

---

|                 |                                                                  |
|-----------------|------------------------------------------------------------------|
| <b>ACC</b>      | Adrenocortical carcinoma                                         |
| <b>BLCA</b>     | Bladder Urothelial Carcinoma                                     |
| <b>BRCA</b>     | Breast invasive carcinoma                                        |
| <b>CESC</b>     | Cervical squamous cell carcinoma and endocervical adenocarcinoma |
| <b>CHOL</b>     | Cholangiocarcinoma                                               |
| <b>COAD</b>     | Colon adenocarcinoma                                             |
| <b>ESCA</b>     | Esophageal carcinoma                                             |
| <b>GBM</b>      | Glioblastoma multiforme                                          |
| <b>HNSC</b>     | Head and Neck squamous cell carcinoma                            |
| <b>KICH</b>     | Kidney Chromophobe                                               |
| <b>KIRC</b>     | Kidney renal clear cell carcinoma                                |
| <b>KIRP</b>     | Kidney renal papillary cell carcinoma                            |
| <b>LAML</b>     | Acute Myeloid Leukemia                                           |
| <b>LGG</b>      | Brain Lower Grade Glioma                                         |
| <b>LIHC</b>     | Liver hepatocellular carcinoma                                   |
| <b>LUAD</b>     | Lung adenocarcinoma                                              |
| <b>LUSC</b>     | Lung squamous cell carcinoma                                     |
| <b>OV</b>       | Ovarian serous cystadenocarcinoma                                |
| <b>PAAD</b>     | Pancreatic adenocarcinoma                                        |
| <b>PRAD</b>     | Prostate adenocarcinoma                                          |
| <b>READ</b>     | Rectum adenocarcinoma                                            |
| <b>SKCM</b>     | Skin Cutaneous Melanoma                                          |
| <b>STAD</b>     | Stomach adenocarcinoma                                           |
| <b>TGCT</b>     | Testicular Germ Cell Tumors                                      |
| <b>THCA</b>     | Thyroid carcinoma                                                |
| <b>UCEC</b>     | Uterine Corpus Endometrial Carcinoma                             |
| <b>UCS</b>      | Uterine Carcinosarcoma                                           |
| <b>COADREAD</b> | Colon adenocarcinoma/Rectum adenocarcinoma Esophageal carcinoma  |
| <b>ALL</b>      | Acute Lymphoblastic Leukemia                                     |
| <b>STES</b>     | Stomach and Esophageal carcinoma                                 |
| <b>KIPAN</b>    | Pan-kidney cohort (KICH+KIRC+KIRP)                               |
| <b>WT</b>       | High-Risk Wilms Tumor                                            |
| <b>PCPG</b>     | Pheochromocytoma and Paraganglioma                               |

---
